# Supplementary material for: Influence of Membrane CD25 Stability on T Lymphocyte Activity: Implications for Immunoregulation
Source: PubMed Central journal article supplement (PMC2775921; doi:10.1371/journal.pone.0007980), 2009-11-24
Supplement: pone.0007980.s001.pdf [file pone.0007980.s001.pdf]

**Supporting Table 1. Suppression assay cytokine levels**

| Cytokine       |      | Treg                | 1:1 Treg:Teff          | Teff                  | % Suppression |
|----------------|------|---------------------|------------------------|-----------------------|---------------|
| Eotaxin        | SFM  | 25.7 $\pm$ 15.7*    | 32.7 $\pm$ 30.9        | 31.9 $\pm$ 27.7**     | -2.5          |
|                | 1%AS | 22.5 $\pm$ 14.4     | 23.2 $\pm$ 13.2        | 43.4 $\pm$ 33.0       | 46.5          |
| GM-CSF         | SFM  | 6.6 $\pm$ 8.6       | 106.5 $\pm$ 70.4       | 194.2 $\pm$ 259.1     | 45.2          |
|                | 1%AS | 6.5 $\pm$ 9.1       | 38.0 $\pm$ 31.8        | 275.5 $\pm$ 118.0     | 86.2          |
| IFN- $\gamma$  | SFM  | 13.7 $\pm$ 24.0     | 1254.6 $\pm$ 1578.5    | 5146.3 $\pm$ 5292.8   | 75.6          |
|                | 1%AS | 20.1 $\pm$ 42.3     | 309.2 $\pm$ 267.8      | 4971.8 $\pm$ 2932.7   | 93.8          |
| IL-10          | SFM  | 10.3 $\pm$ 14.2     | 45.2 $\pm$ 63.7        | 14.0 $\pm$ 21.9*      | -222.9        |
|                | 1%AS | 20.4 $\pm$ 26.8     | 56.3 $\pm$ 57.9        | 100.5 $\pm$ 108.8     | 44.0          |
| IL-12p40       | SFM  | 61.8 $\pm$ 46.4     | 293.1 $\pm$ 322.8      | 644.4 $\pm$ 667.3     | 54.5          |
|                | 1%AS | 38.8 $\pm$ 42.4     | 146.3 $\pm$ 42.3       | 421.4 $\pm$ 161.5     | 65.3          |
| IL-12p70       | SFM  | 3.8 $\pm$ 3.6       | 4.4 $\pm$ 4.0          | 6.7 $\pm$ 7.3         | 34.3          |
|                | 1%AS | 4.1 $\pm$ 2.8       | 5.1 $\pm$ 4.3          | 6.8 $\pm$ 4.4         | 25.0          |
| IL-13          | SFM  | 42.4 $\pm$ 63.4     | 268.6 $\pm$ 273.5      | 306.1 $\pm$ 307.7     | 12.3          |
|                | 1%AS | 37.2 $\pm$ 80.1     | 123.0 $\pm$ 165.7      | 196.2 $\pm$ 156.3     | 37.3          |
| IL-15          | SFM  | ND†                 | ND                     | ND                    | ND            |
|                | 1%AS | ND                  | ND                     | ND                    | ND            |
| IL-1 $\alpha$  | SFM  | 26.7 $\pm$ 48.9     | 211.3 $\pm$ 253.1      | 289.6 $\pm$ 346.8     | 27.0          |
|                | 1%AS | 31.9 $\pm$ 31.9     | 146.3 $\pm$ 75.3       | 415.1 $\pm$ 94.4      | 64.8          |
| IL-1 $\beta$   | SFM  | 5.2 $\pm$ 0.1       | 6.6 $\pm$ 2.0          | 7.9 $\pm$ 2.7         | 16.5          |
|                | 1%AS | 5.0 $\pm$ 0.3       | 8.0 $\pm$ 1.7          | 14.3 $\pm$ 10.0       | 44.1          |
| IL-2           | SFM  | 4.0 $\pm$ 5.9       | 11.7 $\pm$ 10.2*       | 129.6 $\pm$ 155.5     | 91.0          |
|                | 1%AS | 2.4 $\pm$ 4.2       | 2.1 $\pm$ 3.6          | 4.4 $\pm$ 6.3         | 52.3          |
| IL-3           | SFM  | 21.3 $\pm$ 20.0     | 130.8 $\pm$ 121.2      | 258.8 $\pm$ 225.2     | 49.5          |
|                | 1%AS | 11.3 $\pm$ 23.4     | 54.4 $\pm$ 45.7        | 240.3 $\pm$ 126.8     | 77.4          |
| IL-4           | SFM  | 8.8 $\pm$ 15.3      | 11.8 $\pm$ 17.2        | 12.0 $\pm$ 18.6       | 1.7           |
|                | 1%AS | 9.2 $\pm$ 16.7      | 9.2 $\pm$ 16.3         | 9.7 $\pm$ 16.5        | 5.2           |
| IL-5           | SFM  | 19.5 $\pm$ 48.0     | 87.8 $\pm$ 110.6       | 34.7 $\pm$ 51.7       | -153.0        |
|                | 1%AS | 29.1 $\pm$ 71.2     | 81.1 $\pm$ 124.0       | 86.0 $\pm$ 93.0       | 5.7           |
| IL-6           | SFM  | 13.0 $\pm$ 12.9     | 28.0 $\pm$ 25.1        | 53.5 $\pm$ 58.9       | 47.7          |
|                | 1%AS | 20.2 $\pm$ 27.0     | 29.5 $\pm$ 40.0        | 74.2 $\pm$ 83.6       | 60.2          |
| IL-7           | SFM  | 236.3 $\pm$ 50.9    | 285.0 $\pm$ 64.9       | 270.6 $\pm$ 61.2      | -5.3          |
|                | 1%AS | 203.4 $\pm$ 98.2    | 275.8 $\pm$ 53.8       | 301.0 $\pm$ 29.2      | 8.4           |
| IL-8           | SFM  | 2251.6 $\pm$ 750.6  | 6363.5 $\pm$ 5016.3    | 6437.0 $\pm$ 3993.0   | 1.10          |
|                | 1%AS | 2187.9 $\pm$ 1534.3 | 10526.8 $\pm$ 11170.1‡ | 5863.3 $\pm$ 1406.8   | -79.5         |
| IP-10          | SFM  | 390.7 $\pm$ 676.1   | 6882.1 $\pm$ 10286.8‡  | 7693.2 $\pm$ 11335.0‡ | 10.5          |
|                | 1%AS | 345.8 $\pm$ 273.5   | 2165.4 $\pm$ 1276.6    | 9645.5 $\pm$ 5837.7   | 77.6          |
| MCP-1          | SFM  | 157.0 $\pm$ 195.6   | 304.5 $\pm$ 255.4*     | 408.3 $\pm$ 278.7**   | 25.4          |
|                | 1%AS | 221.8 $\pm$ 239.9   | 574.6 $\pm$ 431.6      | 1038.9 $\pm$ 551.8    | 44.7          |
| MIP-1 $\alpha$ | SFM  | 14.2 $\pm$ 14.1     | 371.0 $\pm$ 581.2*     | 1164.8 $\pm$ 1937.5*  | 68.1          |
|                | 1%AS | 23.7 $\pm$ 25.4     | 611.9 $\pm$ 754.0      | 9905.3 $\pm$ 7667.8   | 93.8          |
| RANTES         | SFM  | 76.6 $\pm$ 144.0    | 380.3 $\pm$ 655.9      | 384.4 $\pm$ 519.6     | 1.1           |
|                | 1%AS | 83.0 $\pm$ 184.0    | 291.3 $\pm$ 335.4      | 1082.2 $\pm$ 909.7    | 73.1          |
| TNF $\alpha$   | SFM  | 1.1 $\pm$ 2.6       | 62.9 $\pm$ 102.2       | 199.1 $\pm$ 259.3*    | 68.4          |
|                | 1%AS | 1.8 $\pm$ 3.3       | 41.2 $\pm$ 39.1        | 502.6 $\pm$ 294.8     | 91.8          |

Cytokine data represents the mean concentration (pg/ml)  $\pm$  SD (N=7 control subjects). Cytokine levels were determined from culture supernatant pooled from triplicate wells (stored at -20°C) and subsequently diluted 1:2 prior to analysis. †ND, indicates no detection. ‡ Designates samples with values exceeded the top standard for the assay. Percent suppression of cytokine production by Treg is calculated from the following equation: % Suppression = [1-(mean concentration Treg+Teff)/(mean concentration Teff alone) \* 100]. Significant differences between SFM and 1%AS indicated as \* p<0.05 and \*\* p<0.01.
